# Supplementary material
Source: PubMed Central journal article supplement (PMC3978808)
Supplement: mt2013193x1.pdf [file mt2013193x1.pdf]

## Supplementary Figures and Tables

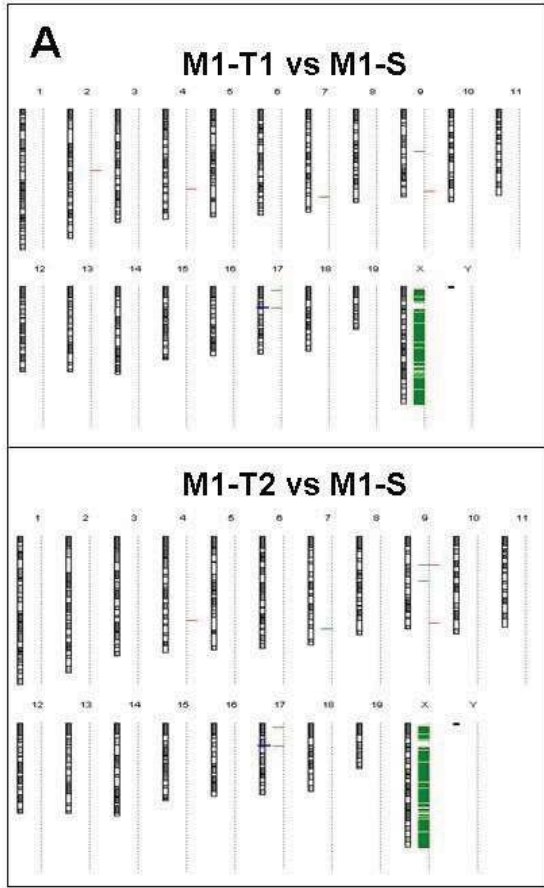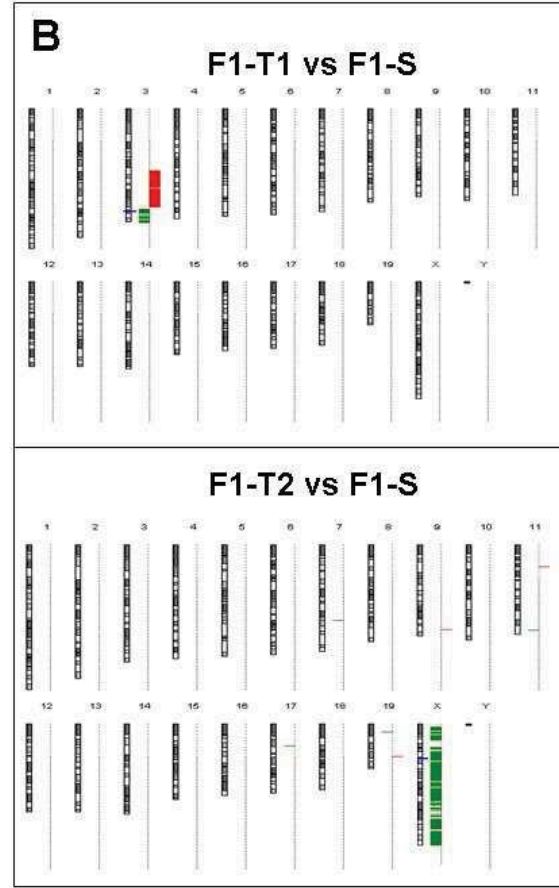

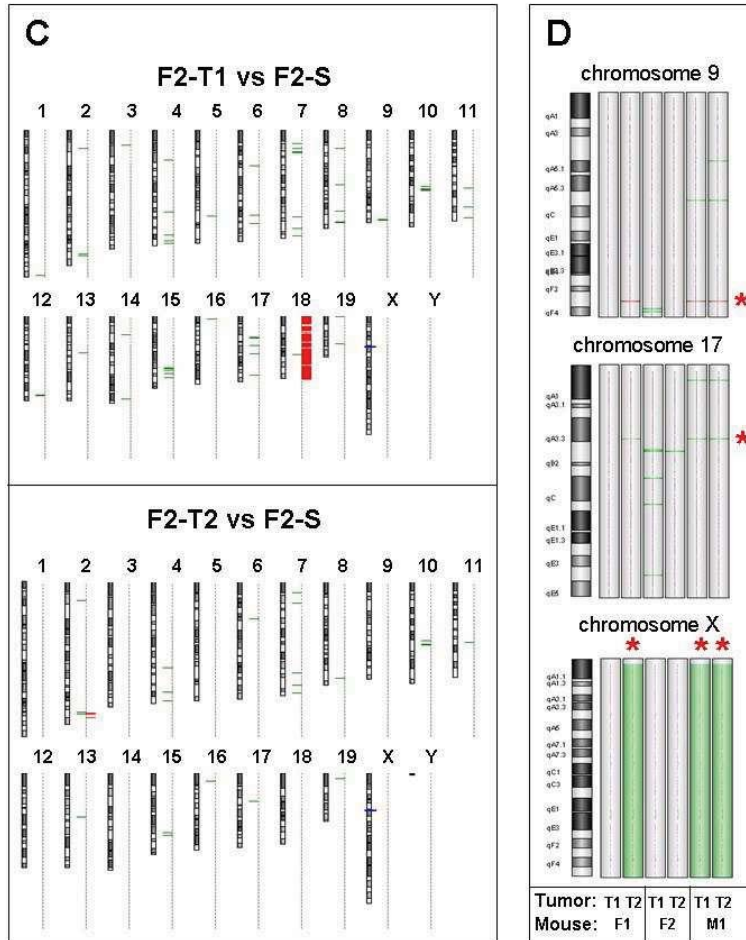

**Figure S1. Distribution of chromosomal aberrations in the FIV-induced liver tumors.** Comparative genomic hybridization (CGH) was performed on genomic DNA extracted from tumors (T1, T2) obtained from male mouse, M1 and female mice, F1 and F2, and compared to DNA extracted from the surrounding, non-tumorous, tissue (S). Amplifications (red) and deletions (green). (a-c) Distribution of aberrations according to chromosome. (d) Small aberrations in chromosomes 9 and 17, as well as a complete deletion of the X chromosome, were common to the three tumors, F1-T2, M1-T1 and M1-T2, (marked by a red asterix).

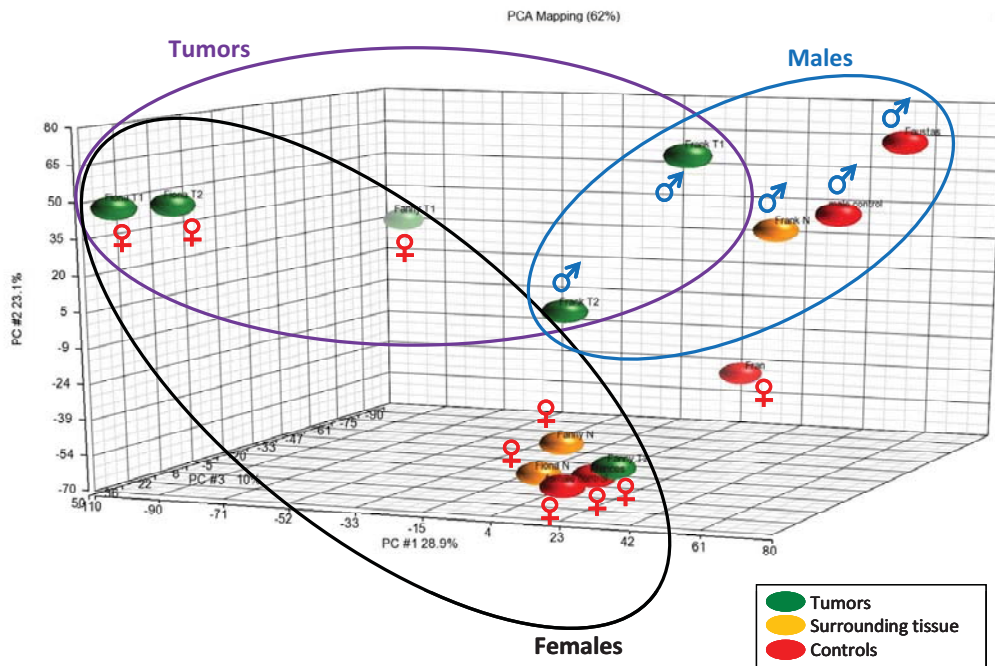

**Figure S2. A graphical representation of the Principal Component Analysis (PCA) of genome scale gene expression profiling data obtained from FIV-transduced and control mice. Tumor tissue (T, green); matched non-tumorous liver tissue (N, yellow); liver tissue from healthy untransduced, or from tumor-free FIV-transduced mice (H, red). Male clusters (blue line); female clusters (black line); tumors (purple line).**

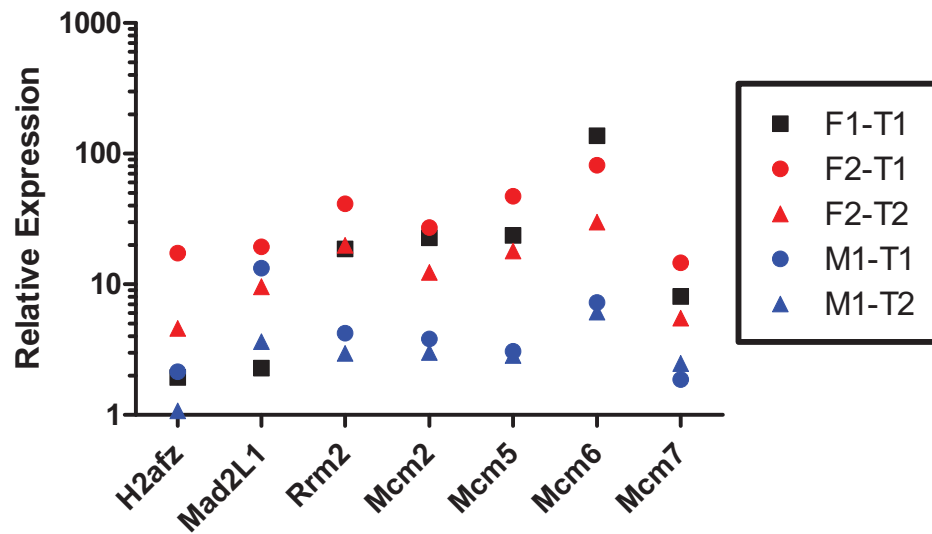

**Figure S3. Validation of genome-wide microarray expression data by qRT-PCR.** Total RNA was extracted from the five FIV-induced HCCs that shared gene expression patterns. Seven E2F target genes that were significantly upregulated in the genome-wide expression arrays were validated by qRT-PCR. Relative quantitation (RQ) of the tumor tissue was calculated using non-tumorous tissue as the calibrator (RQ=1). HPRT was used as the endogenous control.

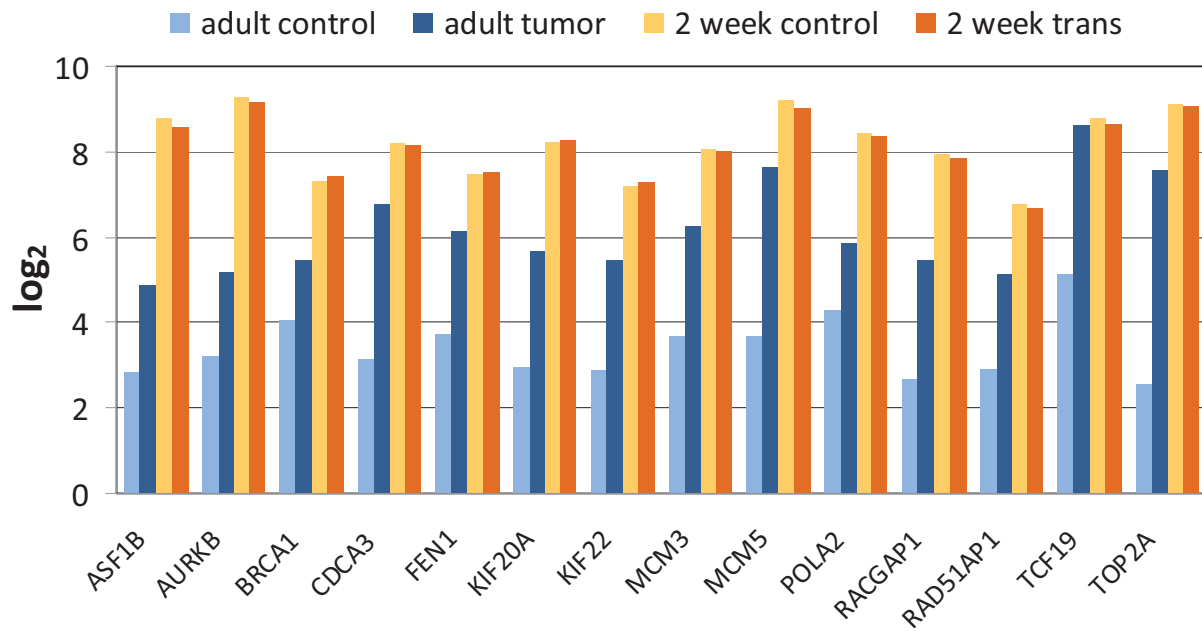

**Figure S4. High level of E2F target gene expression in livers of young mice.**

Expression levels of E2F target genes common to humans and rats that were upregulated in the FIV-induced tumors, as determined by genome-wide array analysis. Microarray analysis was performed on total RNA extracted from FIV-induced liver tumors that developed in adult mice (dark blue) and matched surrounding tissue (light blue), as well as from livers of 10 day old mice untransduced (yellow) and FIV-transduced (orange). The following housekeeping genes were expressed at the same level in all datasets: *Arl6ip1*, *Copb2*, *Eif2s3x*, *Man1a*, *Srp9*, *Tfg*, and *Ywhae*.

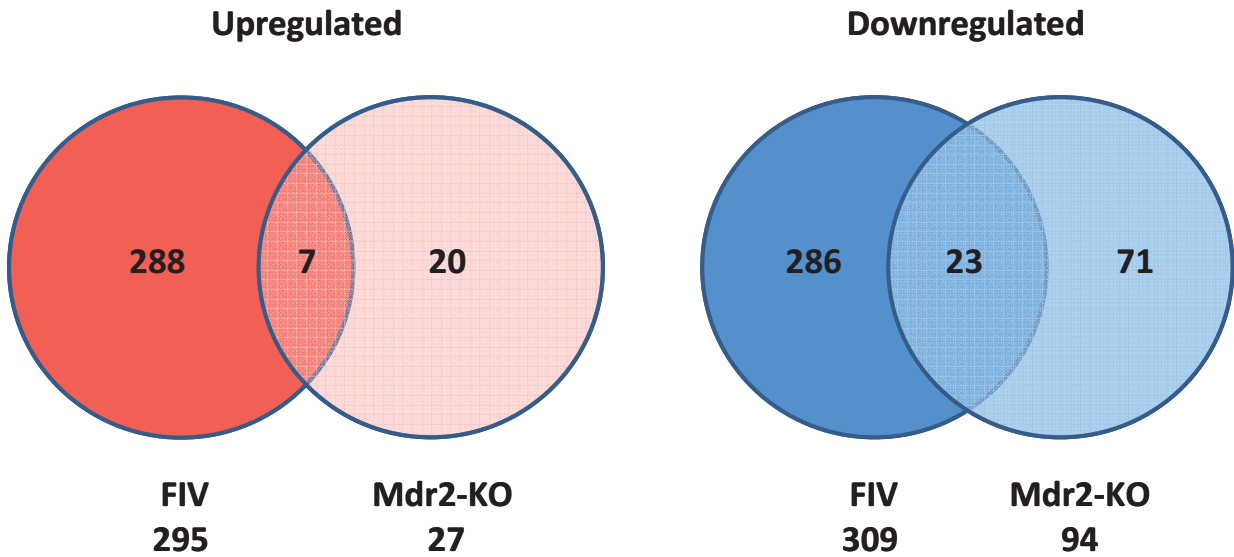

**Figure S5. Comparison of deregulated genes between the two murine HCC models, namely, FIV-induced (current study) and inflammation-mediated Mdr2-KO mice<sup>34</sup>.** The Venn diagram demonstrates numbers of gene probes that were either up- or down-regulated in at least four tumors in each dataset. Fold-change threshold for tumor versus non-tumor was  $\geq 1.8$  for up-regulated and  $\leq -1.8$  for down-regulated genes. Six tumors were analyzed in each HCC model and compared to matched non-tumor tissue (3 samples in FIV dataset and 4 in the Mdr2-KO dataset).

**Table S1. FIV integration sites within liver tumors**

| Tumor ID | Chromosomal Location <sup>a</sup> | Gene Symbol   | Intragenic <sup>b</sup> | Intergenic (bps) <sup>c</sup> |        | Integration orientation <sup>d</sup> |
|----------|-----------------------------------|---------------|-------------------------|-------------------------------|--------|--------------------------------------|
| F1(T1)   | Chr4: 82315639                    | Nfib          | intron 10               |                               |        | opposite                             |
|          | Chr4: 106175353                   |               |                         |                               | >100kb |                                      |
|          | Chr5: 115025088                   | Spp13         | intron 1                |                               |        | same                                 |
|          | Chr6: 4677827                     | Sgce          | intron 10               |                               |        | same                                 |
|          | Chr13: 77132015                   | Ankrd32       | intron 1                |                               |        | opposite                             |
|          | Chr14: 22596501                   | 1700112E06Rik | exon 4-<br>intron 5     |                               |        | opposite                             |
|          | Chr18: 9309351                    | ccny          |                         | upstream                      | 4580   | same                                 |
|          | Chr19: 29513373                   | A930007119Rik | intron 2                |                               |        | same                                 |
| F1(T2)   | Chr1: 134747726                   | Syt2          | 3'UTR                   |                               |        | same                                 |
|          | Chr2: 76984794                    | Ttn           |                         | upstream                      | 2500   | same                                 |
|          | Chr4: 64586468                    |               |                         |                               | >100kb |                                      |
|          | Chr10: 84917375                   | Ric8b         |                         | upstream                      | 241    | opposite                             |
|          | Chr19: 6904891                    | Prdx5         |                         | downstream                    | 4754   | same                                 |
|          | Chr19 :61095340                   | Grk5          |                         | downstream                    | 3038   | opposite                             |
| F2(T1)   | Chr1: 15845050                    | Terf1         |                         | downstream                    | 1621   | opposite                             |
|          | Chr1: 13539165                    | Tram1         |                         | downstream                    | 50699  | same                                 |
|          | Chr5: 88759162                    | AK046278      | exon1                   |                               |        |                                      |
|          | Chr6: 122437822                   | Rimklb        |                         | downstream                    | 9480   | opposite                             |
|          | Chr11: 12876885                   |               |                         |                               | >100kb |                                      |
|          | Chr18: 84327800                   | Zfp407        | intron 7                |                               |        | same                                 |
|          | ChrX: 72959054                    | Nsdh1         |                         | downstream                    | 526    | opposite                             |
| F2(T2)   | Chr3: 107325730                   | AK048987      | 3'UTR                   |                               |        | opposite                             |
|          | Chr5: 143645250                   | Cyth3         | intron 1                |                               |        | same                                 |
| M1(T1)   | Chr3: 63958416                    | Slc33a1       | intron 1                |                               |        | same                                 |
|          | Chr9: 108531707                   | Qrich1        | intron 2                |                               |        | opposite                             |
|          | Chr12: 85327916                   | Nek9          | intron 16               |                               |        | same                                 |
|          | Chr16: 31262903                   | Ppp1r2        | intron 2                |                               |        | same                                 |
| M1(T2)   | Chr16: 4626884                    | Coro7         | intron 9                |                               |        | opposite                             |

<sup>a</sup> Location of first nucleotide following 3' LTR according to the UCSC Genome Browser, Dec 2011 mouse assembly.

<sup>b</sup> Location of integration within gene.

<sup>c</sup> Position and distance of viral insertion relative to nearest gene within 100kb.

<sup>d</sup> Orientation of vector LTR with respect to the direction of transcription of the targeted gene.

**Table S2. Syntenic regions of human common fragile sites in the mouse genome.**

| Fragile site name | Human genome <sup>a</sup>  | Size (bp)  | Mouse genome <sup>a</sup> | Size (bp)  | Tumors bearing a coinciding chromosomal aberration <sup>b</sup> | Location of aberration   |
|-------------------|----------------------------|------------|---------------------------|------------|-----------------------------------------------------------------|--------------------------|
| FRA1E             | chr1: 68362127-156421365   | 88,059,239 | chr3: 86799634-159599772  | 72,800,139 | F1-T1                                                           | chr3: 87535405-159870502 |
| FRA1H             | chr1: 205641715-225711350  | 20,069,636 | chr1: 181768214-197047501 | 15,279,288 |                                                                 |                          |
| FRA2G             | chr2: 139785273-188118461  | 48,333,189 | chr2: 39363343-84313407   | 44,950,065 |                                                                 |                          |
| FRA3B             | chr3: 57917214-63984740    | 6,067,527  | chr14: 8637918-14953921   | 6,316,004  |                                                                 |                          |
| FRA4F             | chr4: 93567701-93586956    | 19,256     | chr6: 63311998-63322971   | 10,974     |                                                                 |                          |
| FRA6E             | chr6: 160023022-167303093  | 7,280,072  | chr17: 7175001-13208514   | 6,033,514  |                                                                 |                          |
| FRA6F             | chr6: 100641521-155090183  | 54,448,663 | chr10: 3011989-51231556   | 48,219,568 |                                                                 |                          |
| FRA6H             | chr6: 29430682-33405196    | 3,974,515  | chr17: 34042414-37636846  | 3,594,433  | F2-T1, F2-T2                                                    | chr17: 34622785-35297915 |
| FRA7E             | chr7: 76539913-92524425    | 15,984,513 | chr5: 3144811-20984943    | 17,840,133 |                                                                 |                          |
| FRA7G             | chr7: 92596878-150189329   | 57,592,452 | chr6: 3320884-48858948    | 45,538,065 |                                                                 |                          |
| FRA7K             | chr7: 107559442-111923382  | 4,363,941  | chr12: 40896394-45712997  | 4,816,604  |                                                                 |                          |
| FRA7H             | chr7: 92596878-150189329   | 57,592,452 | chr6: 3320884-48858948    | 45,538,065 |                                                                 |                          |
| FRA7I             | chr7: 92596878-150189329   | 57,592,452 | chr6: 3320884-48858948    | 45,538,065 |                                                                 |                          |
| FRA8C             | chr8: 97515808-146131251   | 48,615,444 | chr15: 32717008-76767049  | 44,050,042 |                                                                 |                          |
| FRA9E             | chr9: 27315071-122528763   | 95,213,693 | chr4: 34896196-70204380   | 35,308,185 |                                                                 |                          |
| FRA9G             | chr9: 6745997-27290706     | 20,544,710 | chr4: 73894394-94597321   | 20,702,928 |                                                                 |                          |
| FRA11E            | chr11: 26252973-57510525   | 31,257,553 | chr2: 84322813-110832617  | 26,509,805 | M1-T1                                                           | chr2: 85936918-85946800  |
| FRA11F            | chr11: 71304680-88990549   | 17,685,870 | chr7: 94258787-109226497  | 14,967,711 |                                                                 |                          |
| FRA11G            | chr11: 106957827-134348749 | 27,390,923 | chr9: 25880811-53831242   | 27,950,432 | M1-T2                                                           | chr9: 37858515-37931443  |
| FRA13A            | chr13: 33378325-40146259   | 6,767,935  | chr3: 52065711-56976945   | 4,911,235  |                                                                 |                          |
| FRA13E            | chr13: 52124034-101887709  | 49,763,676 | chr14: 79986707-125114860 | 45,128,154 |                                                                 |                          |
| FRA16D            | chr16: 45250774-88637531   | 43,386,758 | chr8: 87782679-126060687  | 38,278,009 |                                                                 |                          |

<sup>a</sup>Chromosomal locations according to UCSC Genome Browser assemblies 2006

<sup>b</sup>Chromosomal aberrations as determined by CGH.



**Table S3. Summary of FIV integration profiling following high throughput sequencing of transduced AML 12 cells**

| <i>BIOINFORMATIC ANALYSIS</i>                            | <i>DEFINITION</i>                                                                                                        | <i>NO. OR % OF SEQUENCES<sup>a</sup></i> |
|----------------------------------------------------------|--------------------------------------------------------------------------------------------------------------------------|------------------------------------------|
| <i>no. of raw sequences</i>                              | Number of sequences that were generated by 454 high throughput sequencing.                                               | 93,115                                   |
| <i>output of sorter</i>                                  | The sorter removes the viral LTR, barcode sequences, and genomic sequences that do not immediately follow the LTR.       | 72,994                                   |
| <i>output of CD-HIT</i>                                  | Redundant sequences are removed from the output of sorter.                                                               | 32,480                                   |
| <i>output of ISA</i>                                     | Sequences that are too small are removed from the output of CD-HIT; remaining sequences are matched to the mouse genome. | 19,603                                   |
| <i>no hits found</i>                                     | No matches were found in the UCSC Genome Browser.                                                                        | 991                                      |
| <i>no gene within 150 kb</i>                             | No gene was found within 150 kb of the integration site.                                                                 | 1,988                                    |
| <i>number of unique sequences</i>                        | This equals the output of ISA minus (multiple hits + no hits).                                                           | 17,576                                   |
| <b>RESULTS</b>                                           |                                                                                                                          |                                          |
| <i>hits in gene</i>                                      | Number of integrations occurring within a gene.                                                                          | 6,437                                    |
| <i>% of integrations within genes</i>                    | Number of integrations within genes/number of unique sequences.                                                          | 37±2                                     |
| <i>number of integrations in repeat sequences</i>        | Number of sequences in LINEs, SINEs, LTRs.                                                                               | 1,036                                    |
| <i>% of integrations in repeat sequences</i>             | Percentage of sequences in LINEs, SINEs, LTRs.                                                                           | 9±4.8                                    |
| <i>number of integrations upstream of closest gene</i>   |                                                                                                                          | 5,818                                    |
| <i>% of integrations upstream of closest gene</i>        | Of integrations occurring between genes, the percentage that were upstream of the closest gene.                          | 38±1                                     |
| <i>number of integrations downstream of closest gene</i> |                                                                                                                          | 9,241                                    |
| <i>% of integrations downstream of closest gene</i>      | Of integrations occurring between genes, the percentage that were downstream of the closest gene.                        | 62±1                                     |

<sup>a</sup> sum or average of four experiments±SD

**Table S4: Genes deregulated in livers of tumor-free, transduced mice, compared to untransduced controls**

| Gene Symbol                                         | Gene Title                                               | (O)<br>Oncogene<br>or (TS)<br>Tumor | Signaling<br>network | HCC<br>associated<br>genes |
|-----------------------------------------------------|----------------------------------------------------------|-------------------------------------|----------------------|----------------------------|
| <b>Genes up-regulated in FIV-transduced liver</b>   |                                                          |                                     |                      |                            |
| <b>Arntl</b>                                        | aryl hydrocarbon receptor nuclear translocator-like      |                                     | P53                  |                            |
| <b>Cdkn1a</b>                                       | cyclin-dependent kinase inhibitor 1A (P21)               | TS                                  | P53                  | √                          |
| <b>Chka</b>                                         | choline kinase alpha                                     | O                                   |                      |                            |
| <b>Ddit4</b>                                        | DNA-damage-inducible transcript 4                        | TS                                  | P53                  | √                          |
| <b>Dusp6</b>                                        | dual specificity phosphatase 6                           | O/TS                                |                      |                            |
| <b>Egr1</b>                                         | early growth response 1                                  | O/TS                                | P53                  | √                          |
| <b>G0s2</b>                                         | G0/G1 switch gene 2                                      |                                     | PPAR                 |                            |
| <b>Gadd45a</b>                                      | growth arrest and DNA-damage-inducible 45 alpha          |                                     | P53                  | √                          |
| <b>Hspb1</b>                                        | heat shock protein 1                                     |                                     |                      |                            |
| <b>Igfbp1</b>                                       | insulin-like growth factor binding protein 1             |                                     | P53                  |                            |
| <b>Ndr1</b>                                         | N-myc downstream regulated gene 1                        | TS                                  | P53                  | √                          |
| <b>Pdgfr</b>                                        | platelet-derived growth factor, C polypeptide            | O                                   |                      | √                          |
| <b>Pdk4</b>                                         | pyruvate dehydrogenase kinase, isoenzyme 4               |                                     | Rb                   |                            |
| <b>Pnrc1</b>                                        | proline-rich nuclear receptor coactivator 1              |                                     |                      |                            |
| <b>Ppp1r3c</b>                                      | protein phosphatase 1, regulatory (inhibitor) subunit 3C |                                     | P53                  |                            |
| <b>St5</b>                                          | suppression of tumorigenicity 5                          | TS                                  |                      |                            |
| <b>Tbx3</b>                                         | T-box 3                                                  | O                                   |                      |                            |
| <b>Trim34</b>                                       | Tripartite motif protein 34                              |                                     |                      |                            |
| <b>Genes down-regulated in FIV-transduced liver</b> |                                                          |                                     |                      |                            |
| <b>Arm3</b>                                         | armadillo repeat containing, X-linked 3                  |                                     |                      |                            |
| <b>Cish</b>                                         | cytokine inducible SH2-containing protein                |                                     |                      |                            |
| <b>Dact1</b>                                        | dapper homolog 1, antagonist of beta-catenin (xenopus)   | TS                                  | Wnt                  | √                          |
| <b>Dbp</b>                                          | D site albumin promoter binding protein                  |                                     |                      |                            |
| <b>Foxq1</b>                                        | forkhead box Q1                                          |                                     |                      |                            |
| <b>Mcm10</b>                                        | minichromosome maintenance deficient 10 (S.cerevisiae)   |                                     |                      |                            |
| <b>Myc</b>                                          | myelocytomatosis oncogene                                | O                                   | Myc                  |                            |
| <b>Per3</b>                                         | period homolog 3 (Drosophila)                            | TS                                  |                      | √                          |
| <b>Pfkfb3</b>                                       | 6-phosphofructo-2-kinase/fructose-2,6-biphosphatase 3    |                                     |                      |                            |
| <b>Phlda1</b>                                       | pleckstrin homology-like domain, family A, member 1      | TS                                  |                      |                            |
| <b>Plk3</b>                                         | polo-like kinase 3 (Drosophila)                          | TS                                  |                      | √                          |
| <b>Rnd3</b>                                         | Rho family GTPase 3                                      | TS                                  | Rb                   | √                          |
| <b>Tef</b>                                          | thyrotroph embryonic factor                              |                                     |                      |                            |
| <b>Thrsp</b>                                        | thyroid hormone responsive SPOT14 homolog (Rattus)       |                                     |                      |                            |
| <b>Usp2</b>                                         | ubiquitin specific peptidase 2                           |                                     | P53                  | √                          |

**Table S5. HCC-associated oncogenes and tumor suppressors**

| <b>HCC-associated oncogenes</b> | <b>HCC-associated tumor suppressors</b> |        |        |
|---------------------------------|-----------------------------------------|--------|--------|
| Akt                             | Ache                                    | Hic1   | Rprm   |
| Birc2                           | Apc                                     | Igfals | Runx3  |
| Birc5                           | Arid2                                   | Irf2   | Scara5 |
| Bmi1                            | Axin1                                   | Kl     | Sfn    |
| Ccnd1                           | Blm                                     | Klf4   | Sfrp1  |
| Cks1b                           | Brms1                                   | Klf6   | Sfrp2  |
| Ctnnb1                          | Btbd9                                   | Lats1  | Sirt3  |
| Ect2                            | Cacna1g                                 | Lats2  | Socs1  |
| Egf                             | Cadm1                                   | Men1   | Sox1   |
| Egfr                            | Casp8                                   | Mxi1   | Sparc  |
| Eif5a2                          | Cdh1                                    | Ndrp2  | Stk11  |
| Ezh2                            | Cdkn1a                                  | Nf2    | Sulf1  |
| Hgf                             | Cdkn1b                                  | Nr1h4  | Trp53  |
| Id1                             | Cdkn2a                                  | Nrsn2  | Tsc1   |
| Jun                             | Cdkn2b                                  | Pax5   | Tsc2   |
| Mad2l1                          | Creb3l3                                 | Per3   | Vac14  |
| Met                             | Cyr61                                   | Plagl1 | Wrn    |
| Mtdh                            | Dapk1                                   | Plk4   | Xpo4   |
| Myc                             | Dcc                                     | Pml    | Zbbx   |
| Pdgfb                           | Ddx20                                   | Prdm2  |        |
| Pdgfra                          | Dlc1                                    | Ptgs2  |        |
| Pdgfrb                          | Dleu2                                   | Pycard |        |
| Psmc10                          | Dpyd                                    | Rassf1 |        |
| Rhoc                            | Fgf6                                    | Rassf2 |        |
| Sirt1                           | Fgl1                                    | Rassf5 |        |
| Smo                             | Fstl5                                   | Rb1    |        |
| Sulf2                           | Gjd4                                    | Rbl1   |        |
| Tgfa                            | Glo1                                    | Rbl2   |        |
| Vegfa                           | Gorab                                   | Recql  |        |
| Yap1                            | Gstp1                                   | Recql5 |        |

**Table S6. Primer sequences of E2F target genes used for qRT-PCR**

| <b>gene</b> | <b>orientation<sup>a</sup></b> | <b>sequence</b>            |
|-------------|--------------------------------|----------------------------|
| H2afz       | F                              | GAAATCTAGGACAACCAGCCAC     |
|             | R                              | AAGTCTTTTGACGCATTTCTG      |
| Mad2L1      | F                              | GTATCTCAATAATGTGGTGGAAACAG |
|             | R                              | ATATCAAACCTGCCATCTTTCAAGG  |
| Rrm2        | F                              | GCTCTGAAACCCGATGAGAG       |
|             | R                              | GCCTCTGTAACCTGAACTTCTTGG   |
| Mcm2        | F                              | AAGAAGAGGATGGAGAGGAACTC    |
|             | R                              | CCTCCACATCTTCATCATCCAG     |
| Mcm5        | F                              | AGATGAGCTGCTCCAAGACATC     |
|             | R                              | CAGAGGCTGAAATGATGATGC      |
| Mcm6        | F                              | GAGAAACACGCTGGTTGTGAG      |
|             | R                              | AAGGTCTTCAAGGCTCGACAC      |
| Mcm7        | F                              | ATTGTCACTCGTGTGTCTGAAGTC   |
|             | R                              | ACATGATCAGAGGCATGAAAGTG    |

<sup>a</sup>F forward; R reverse
